# Supplementary material
Source: PubMed Central journal article supplement (PMC2782288)
Supplement: tpc.109.067876_1.pdf [file tpc.109.067876_1.pdf]

Supplemental Data. Kaiserli *et al.* (2009) Domain swapping to assess the mechanistic basis of *Arabidopsis* phototropin 1 receptor kinase activation and endocytosis by blue light.

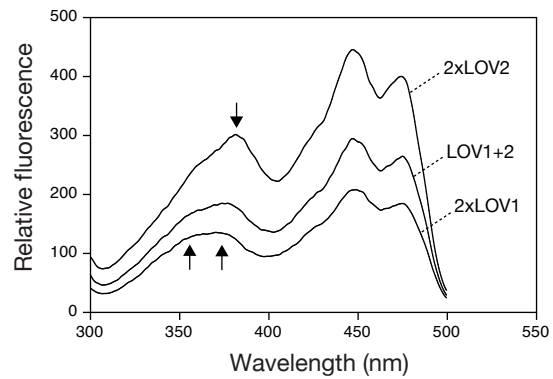

**Supplemental Figure 1. Fluorescence properties of 2xLOV1 and 2xLOV2.**

Fluorescence excitation spectra of wild-type phot1 (LOV1+2), 2xLOV1 and 2xLOV2 (0.4 mg ml<sup>-1</sup>).

Arrows indicate spectral differences between 2xLOV1 and 2xLOV2 in the UV-A region of the spectrum.

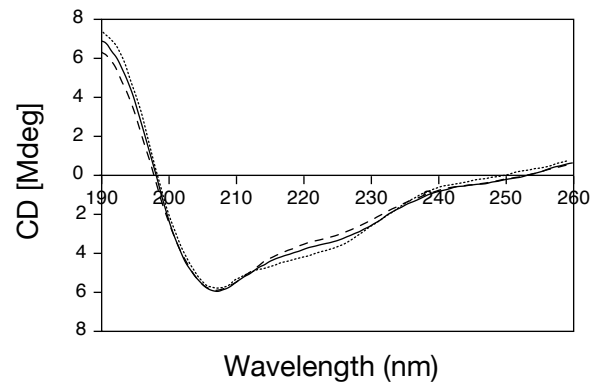

**Supplemental Figure 2. Dark state CD spectra of LOV1+2, 2xLOV1 and 2xLOV2 measured in the far-ultraviolet region (190–260 nm).**

Equal concentrations ( $0.4 \text{ mg ml}^{-1}$ ) of LOV1+2 (solid line), 2xLOV1 (dotted line) and 2xLOV2 (dashed line) were used for analysis.

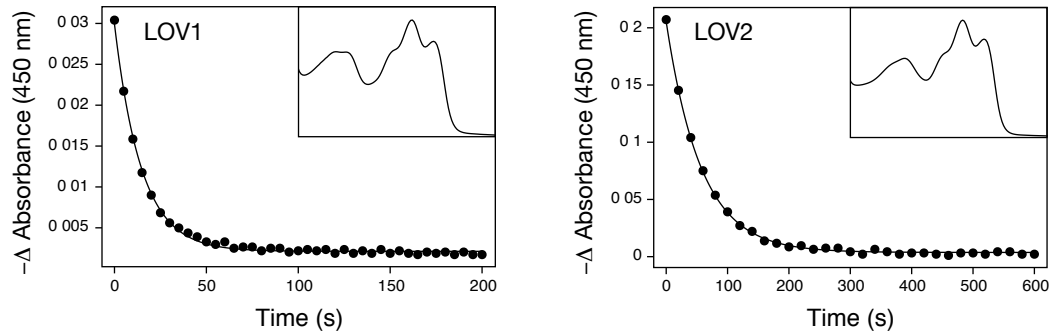

**Supplemental Figure 3. Dark-recovery kinetics for individual LOV1 and LOV2 domains of *Arabidopsis phot1*.** Absorption spectra are shown (inset). Absorption changes after light excitation measured at 450 nm is shown in the main panel. A white-light camera strobe flash provided the excitation pulse. Decay fits to a single exponential with half-lives of 11 s and 40 s, respectively.

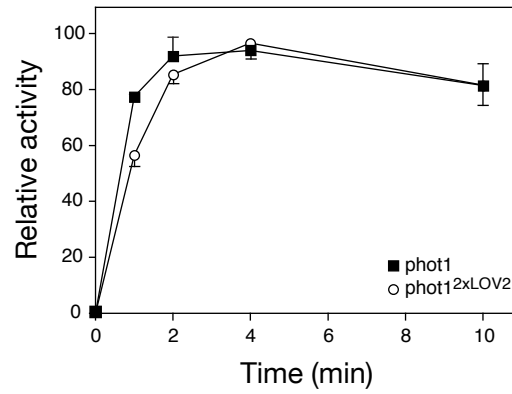

**Supplemental Figure 4. Kinetics of light-dependent autophosphorylation for wild-type phot1 and phot1<sup>2xLOV2</sup> in extracts from insect cells.**

Kinase activity was quantified by phosphorimaging and expressed as a percentage of maximal phosphorylation activity relative to dark controls. Standard errors are shown (n = 3).

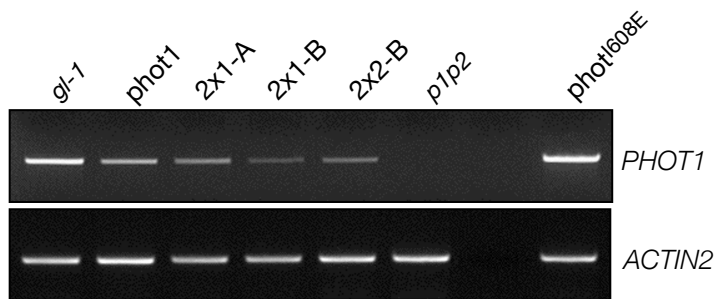

**Supplemental Figure 5. RT-PCR analysis of *PHOT1* transcripts.**

*PHOT1* and control *ACTIN2* transcripts in wild-type *Arabidopsis* (*gl-1*), the *phot1 phot2* double mutant (*p1p2*) and in transgenic lines expressing wild-type *phot1*, *phot1<sup>2xLOV1</sup>* (2x1-A, 2x1-B), *phot1<sup>2xLOV2</sup>* and *phot1<sup>608E</sup>* in the *phot1 phot2* double mutant driven by the 35S promoter. Plants were grown in white light ( $50 \mu\text{mol m}^{-2} \text{s}^{-1}$ ) for 4 weeks.

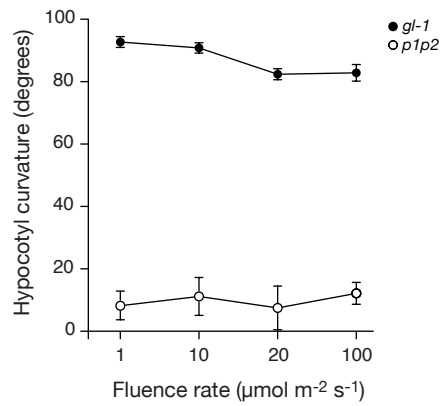

**Supplemental Figure 6. Phototropism fluence-rate response of 3-day old etiolated wild type (*gl-1*) and *phot1 phot2* mutant seedlings (*p1p2*).**

Phototropic curvatures were measured after exposure to unilateral blue light for 24 h. Each value is the mean of at least 20 seedlings. Standard errors are shown.

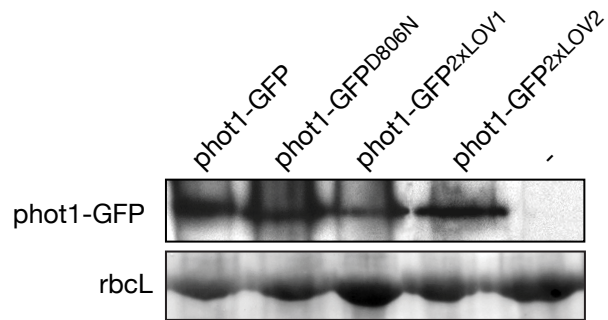

**Supplemental Figure 7. Immunoblot analysis of *Nicotiana benthamiana* expressing phot1-GFP fusions.** Total protein extracts (30  $\mu$ g) from *Nicotiana benthamiana* expressing phot1-GFP, phot1-GFP<sup>D806N</sup>, phot1-GFP<sup>2xLOV1</sup>, phot1-GFP<sup>2xLOV2</sup> from the 35S promoter. Extracts from a non-infiltrated sample (-) were included as a control. Protein extracts were probed with an anti-GFP specific monoclonal antibody. Ponceau S staining of Rubisco large subunit (rbcl) is shown as a loading control.

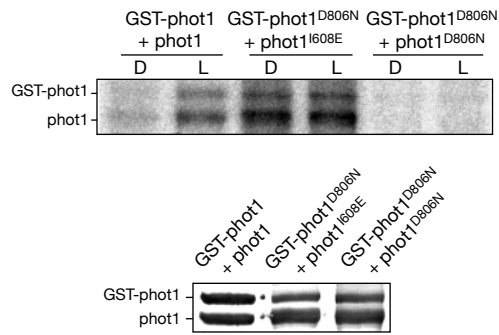

**Supplemental Figure 8. Trans phosphorylation between phot1 molecules.**

Autoradiograph showing light-independent trans phosphorylation of a kinase-inactive version of GST-phot1 (GST-phot1<sup>D806N</sup>) by a constitutively active form of phot1 (phot1<sup>I608E</sup>) in protein extracts from insect cells. Immunoblot analysis of phot1 protein levels is shown below.



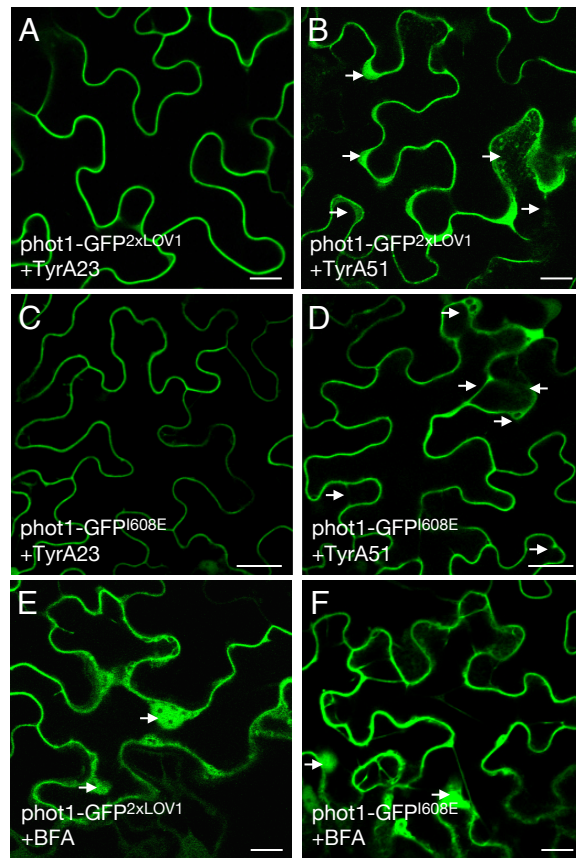

**Supplemental Figure 9. Pharmacological interference of phot1-GFP localization in *Nicotiana benthamiana*.**

**(A)** Treatment with 30  $\mu$ M Tyrphostin A23 (Tyr23) attenuates phot1-GFP<sup>2xLOV1</sup> internalization in tobacco leaf epidermal cells in the absence of light.

**(B)** Treatment with 30  $\mu$ M Tyrphostin A51 (TyrA51), an inactive analogue of Tyrphostin A23 does not affect phot1-GFP<sup>2xLOV1</sup> internalization (indicated by the white arrows).

**(C)** Treatment with 30  $\mu$ M TyrA23 reduces phot1-GFP<sup>I608E</sup> internalization in the absence of light.

**(D)** Treatment with 30  $\mu$ M TyrA51 does not reduce phot1-GFP<sup>I608E</sup> internalization (indicated by the white arrows).

**(E)** Treatment with 50  $\mu$ M Brefeldin A (BFA) induces aggregation of phot1-GFP<sup>2xLOV1</sup> from the plasma membrane into BFA compartments in darkness (indicated by the white arrows).

**(F)** BFA also induces aggregation of phot1-GFP<sup>I608E</sup> (indicated by the white arrows). In each case the scale bar represents 20  $\mu$ m.

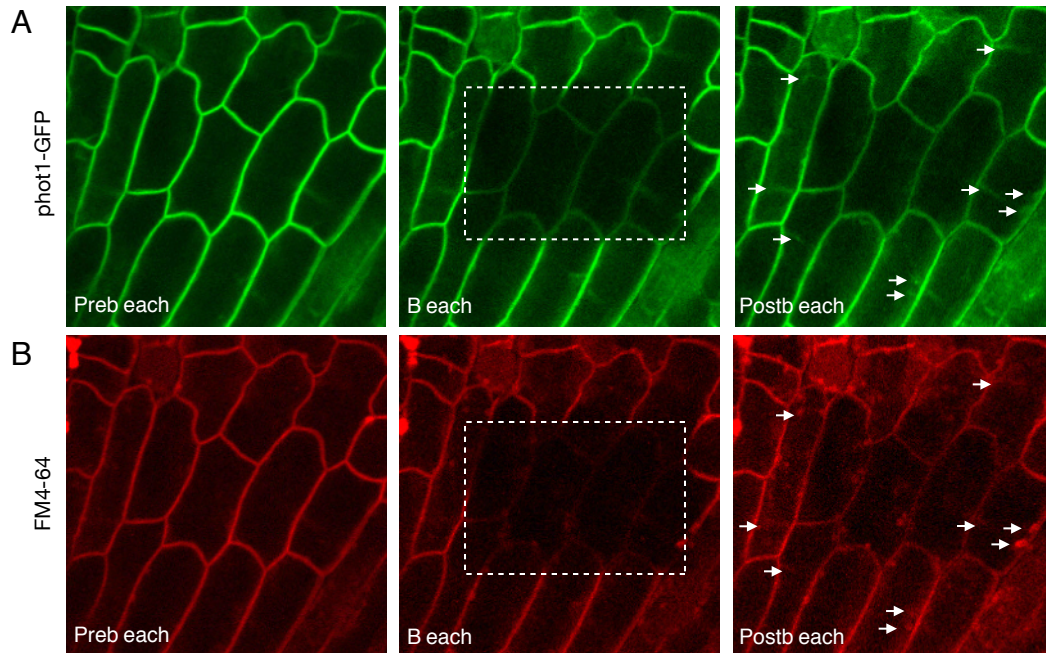

**Supplemental Figure 10. FRAP analysis of phot1-GFP in 3-day old etiolated *Arabidopsis*.**

Bleached area is shown by the dotted line. Representative images prior to photobleaching, following bleaching and post recovery (3 min) are shown. Colocalization of phot1-GFP and FM4-64 following photobleaching is indicated by the white arrows.

**(A)** phot1-GFP

**(B)** FM4-64

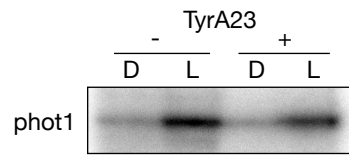

**Supplemental Figure 11. Effect of Tyrphostin A23 (Tyr A23) on phot1 kinase activity in protein extracts from insect cells.**

Autoradiograph showing light-dependent autophosphorylation of extracts treated with DMSO (-) or treated with 30  $\mu$ M Tyr A23 prior to phosphorylation analysis. Samples were given a mock irradiation (D) or irradiated with white light (L) at a total fluence of 10,000  $\mu$ mol m<sup>-2</sup> prior to the addition of radiolabelled ATP.

**Supplemental Table 1. Primers used in this study.**

| Primer               | Sequence                                   |
|----------------------|--------------------------------------------|
| LOV1 DEL_F           | 5'-gagcatgcttgaaacgtcgacaacgcatc-3'        |
| LOV1 DEL_R           | 5'-ctgcatgcagcaagcacactgaagggcc-3'         |
| LOV2 DEL_F           | 5'-gagcatgcctcgatacgttcgagtgtagt-3'        |
| LOV2 DEL_R           | 5'-ctgcatgcagcaagcacgtagaaccagtt-3'        |
| LOV1 SphI_F          | 5'-atgcatgccaacgtttggtctcagatgc-3'         |
| LOV1 SphI_R          | 5'-tagcatgccacctccactgcattccgataaa-3'      |
| LOV2 SphI_F          | 5'-atgcatgcaagaatttcgcatcactga-3'          |
| LOV2 SphI_R          | 5'-tagcatgcccgtctagtgaactccaataaa-3'       |
| pCAL LOV1_F          | 5'-gcggaattcgggattccaagagatcgaa-3'         |
| pCAL LOV1_R          | 5'-ttgcatggttaatcgatcgaatcagagattc-3'      |
| pCAL LOV2_F          | 5'-cgggaattccctgagagtgtggatgataaa-3'       |
| pCAL LOV2_R          | 5'-ttgcatggttagttgcccataaatcatcctc-3'      |
| Link DEL_F           | 5'-gagcatgcagtgctgctcacctccac-3'           |
| Link DEL_R           | 5'-ctgcatgcaatttcgcatcactgatcct-3'         |
| pAcG3X PHOT1_F       | 5'-gcgaattctcaaaaaacattgtttgcag-3'         |
| pAcG3X PHOT1_R       | 5'-gaggatcccatggaaccaacagaaaaaccatcgacc-3' |
| pAcHLT-A LOV2K_F     | 5'-cgggaattccctgagagtgtggatgataaa-3'       |
| pAcHLT-A LOV2K_R     | 5'-atccgggtcaaaaaacattgtttg-3'             |
| PHOT1 trans_F        | 5'-gatacgatgcccgcataaaag-3'                |
| PHOT1 trans_R        | 5'-acagatcaaatcgacaaagagat-3'              |
| ACTIN trans_F        | 5'-cttacaattccgctctgc-3'                   |
| ACTIN trans_R        | 5'-gttgggatgaaccagaagga-3'                 |
| pEZR PHOT1_F         | 5'-gcgaattcgagagctcaagatggaa-3'            |
| pEZR PHOT1_R         | 5'-gcggatccgcaaaaacattgtttg-3'             |
| pEZR LOV2K_F         | 5'-cgggaattccctgagagtgtggatgataaa-3'       |
| pEZR LOV2K_R         | 5'-gcggatccgcaaaaacattgtttg-3'             |
| pSPYCE/SPYNE PHOT1_F | 5'-gcggatccgagagctcaagatggaa-3'            |
| pSPYCE/SPYNE PHOT1_R | 5'-atccggggcaaaaaacattgtttg-3'             |
