# Supplementary material
Source: PubMed Central journal article supplement (PMC2782288)
Supplement: tpc.109.067876_2.pdf [file tpc.109.067876_2.pdf]

Supplemental Data. Kaiserli *et al.* (2009) Domain swapping to assess the mechanistic basis of *Arabidopsis* phototropin 1 receptor kinase activation and endocytosis by blue light.

**Supplemental Datasets. MASCOT search results of proteins identified in GFP immunoprecipitations by LC-MS/MS.**

GFP fusions were immunoprecipitated from 3-day-old dark grown seedlings expressing either phot1-GFP or GFP-Lti6b, after irradiation with blue-light at  $100 \mu\text{mol m}^{-2} \text{s}^{-1}$  for 5 min. The gi number (prot\_acc) and protein description (prot\_desc) identify protein matches from the NCBI database. The protein score (prot\_score) is derived from the combined scores of all observed mass spectra that can be matched to amino acid sequences within that protein. Protein matches (prot\_matches) gives the number of mass spectra assigned to this protein. Peptide rank (pep\_rank) is the rank of the ions match (1 to 10, where 1 is the best match). The pep\_isbold statement (0 = false, 1 = true) denotes whether it is the first time the peptide is matched to a protein in the MASCOT report. Pep\_miss is the number of missed trypsin cleavage sites within the peptide sequence (limited to a maximum of 1). The peptide score (pep\_score) is a probability based MASCOT score:  $-10 \cdot \log(P)$ , where P is the probability that the observed match is a random event. Peptide match expectation value (pep\_expect) is the number of matches with equal or better scores that are expected to occur by chance alone. The sequence of the peptide is shown in pep\_seq, together with the residues that bracket the peptide sequence in the protein (pep\_res\_before and pep\_res\_after). If the peptide forms the protein terminus, then a dash is shown instead. The presence of variable modifications (limited to methionine oxidation and phosphorylation of serine, threonine and tyrosine) is shown (pep\_var\_mod) and their position within the peptide sequence is indicated (pep\_var\_mod\_pos).
